# Supplementary material
Source: Springer Nature journal article supplement (https://www.springermedizin.de/resource/supplementary/12884_2009_265_MOESM2_ESM.pdf/9457350)

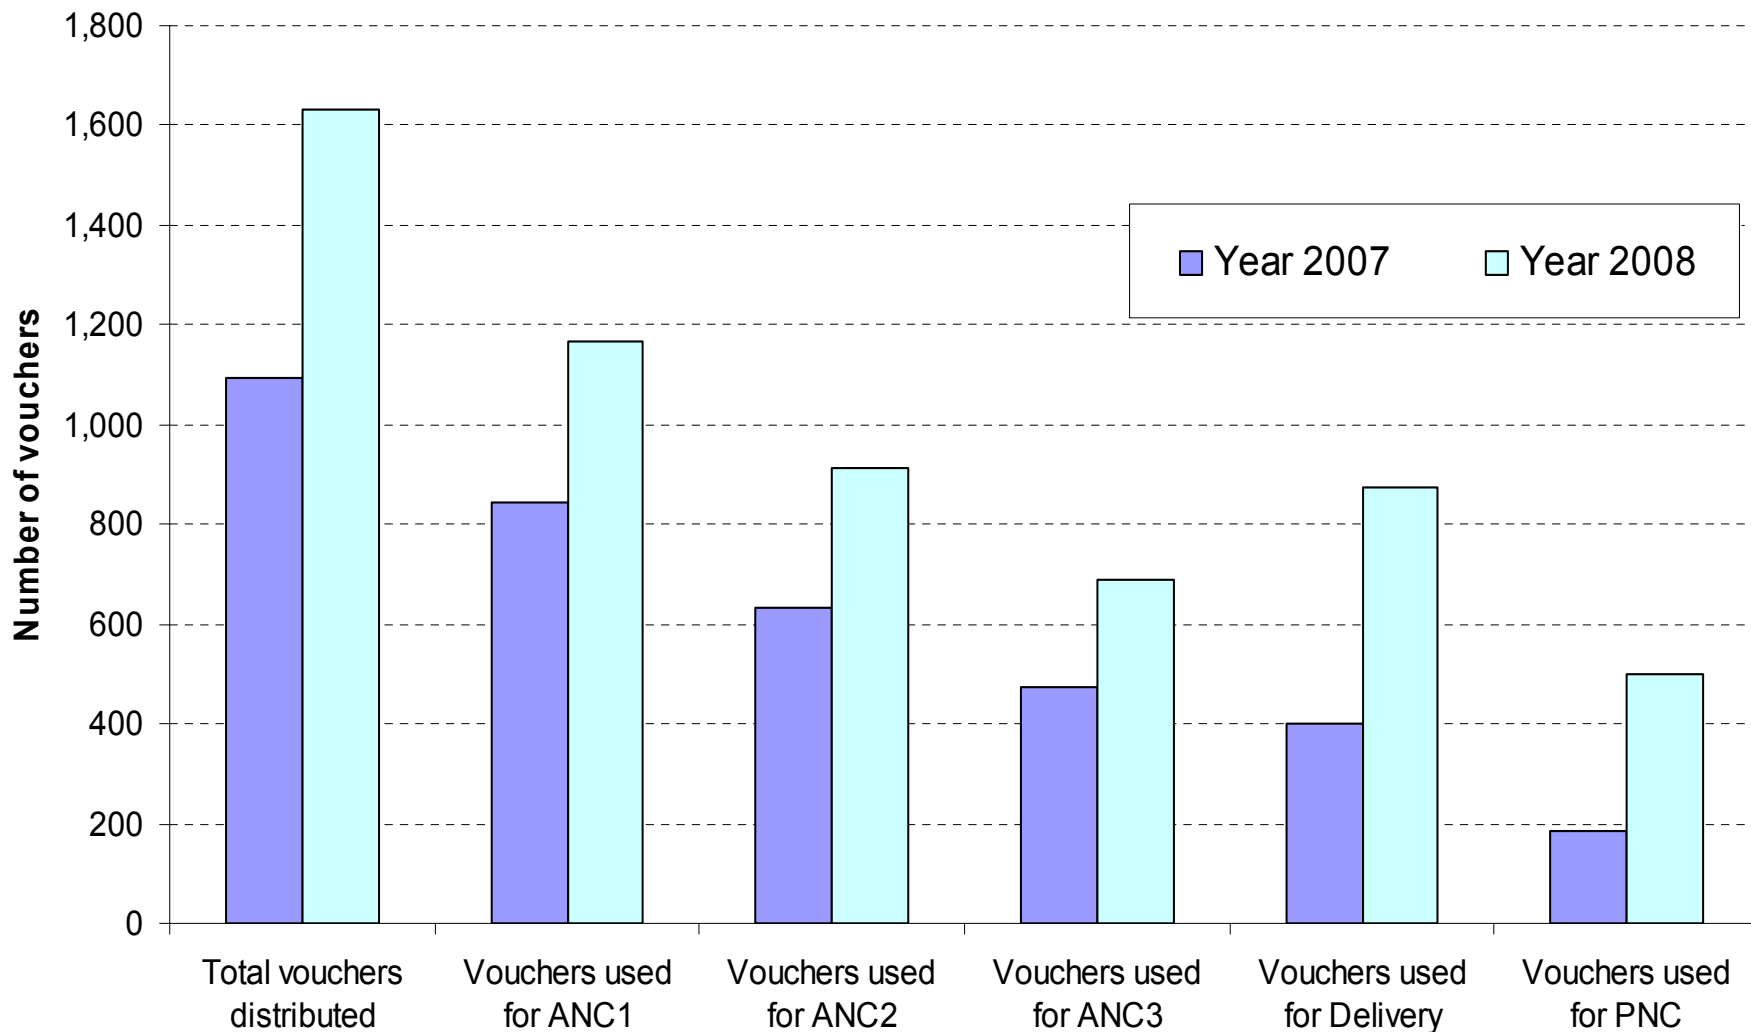

*ANC = Antenatal care; PNC =Postnatal care*

Supplement: MOESM2 [file 9457350]
